# Supplementary material
Source: Frontiers journal article supplement (https://www.frontiersin.org/articles/524844)
Supplement: Data_Sheet_2.pdf [file Data_Sheet_2.pdf]

Date: \_\_\_\_/\_\_\_\_/2013 Time: \_\_\_\_\_ (use 24 hr) Survey ID: \_\_\_\_\_

Pier: \_\_\_\_\_ Data Collector: \_\_\_\_\_

# of people: \_\_\_\_\_ # of lines in water \_\_\_\_\_ MS Coastal County Resident? YES NO State from: \_\_\_\_\_

1) What MS piers do you normally visit? \_\_\_\_\_

2) What time of day do you usually fish at MS piers? Morning Afternoon Evening Night All day Varies  
(Circle all that apply)

3) When do you fish? (Circle all that apply) Just started (1<sup>st</sup> or 2<sup>nd</sup> time)  
Spring (Mar-May) Summer (Jun-Aug) Fall (Sep-Nov) Winter (Dec-Feb) Year round

4) How many days a year do you fish? Just started (1<sup>st</sup> or 2<sup>nd</sup> time)  
1-5 days/yr 6-15 days/yr 16-30 days/yr 31-50 days/yr 51+ days/yr

5) What are you fishing for today? (If more than 2, circle Anything) Anything Catfish Crabs  
Croaker Drum (Red/Redfish/Black) Flounder Ground mullet/Whiting Mackerel (King/Spanish)  
Trout Shark Shrimp Other: \_\_\_\_\_

6) What type of hook are you using today? N/A J-hook Circle Kahle Jig Treble Other: \_\_\_\_\_

7) What bait are you using today? Dead shrimp Live shrimp Squid Crab Live fish: \_\_\_\_\_  
Cut bait/fish: \_\_\_\_\_ Other: \_\_\_\_\_ N/A

8) Do you usually throw your unused bait back in the water? NO YES SOMETIMES

9) Do you usually clean your fish at the piers? NO YES  
If yes, do you throw your fish remains in the water? YES NO SOMETIMES

10) In the past 12 months while fishing in Mississippi, have you ever observed sea turtles in the water? NO YES

11) In the past 12 months while fishing in MS, have you ever observed anyone catch a sea turtle? NO YES, # \_\_\_\_\_  
How many?

12) In the past 12 months while fishing in coastal Mississippi, have YOU ever caught a sea turtle?

a) NO YES, how many? \_\_\_\_\_

**END OF SURVEY IF PARTICIPANT DID NOT CATCH ANY SEA TURTLES OR ASK QUESTIONS ABOUT MOST RECENT CAPTURE**

13) Thinking about the location where you caught the last sea turtle:

b) Were you on? Fishing pier Shore/Beach Head boat Charter boat Private boat

c) When? Spring (Mar-May) Sum (Jun-Aug) Fall (Sep-Nov) Winter (Dec-Feb) Not sure

d) General or specific location: \_\_\_\_\_

14) Was the sea turtle: Hooked Entangled Hooked & entangled Not sure

15) What happened to the turtle?

- a. Turtle broke the line
- b. Turtle was released by fisherman
- c. Released with gear
- d. Gear removed by fisherman
- e. Hook fell out on its own
- f. Turtle collected by rehab facility

16) Did you report the capture? (to IMMS or state agency) YES NO

Survey #: \_\_\_\_\_
